# Supplementary material for: Cost-Related Medication Nonadherence and Desire for Medication Cost Information Among Adults Aged 65 Years and Older in the US in 2022
Source: PubMed Central journal article supplement (PMC10196872; doi:10.1001/jamanetworkopen.2023.14211), 2023-05-18
Supplement: jamanetwopen-e2314211-s001.pdf [file jamanetwopen-e2314211-s001.pdf]

## Supplemental Online Content

Dusetzina SB, Besaw RJ, Whitmore CC, et al. Cost-related medication nonadherence and desire for medication cost information among adults aged 65 years and older in the US in 2022. *JAMA Netw Open*. 2023;6(5):e2314211.  
doi:10.1001/jamanetworkopen.2023.14211

**eTable 1.** Demographic Benchmarks, Sample Characteristics, and Weighted Demographics

**eTable 2.** Sample Disposition and Response Rates

**eTable 3.** Medical Conditions

**eAppendix.** Medication Cost Conversations and Perceptions of a Real Time Benefit Tool National Patient Survey

This supplemental material has been provided by the authors to give readers additional information about their work.

**eTable 1: Demographic Benchmarks, Sample Characteristics, and Weighted Demographics<sup>1</sup>**

| Category           | Values                    | Parameter | Unweighted | Weighted |
|--------------------|---------------------------|-----------|------------|----------|
| Sex by age         | M 65-74                   | 27.5%     | 27.9%      | 27.1%    |
|                    | M 75+                     | 17.7%     | 19.2%      | 18.2%    |
|                    | F 65-74                   | 31.7%     | 34.6%      | 32.5%    |
|                    | F 75+                     | 23.1%     | 18.3%      | 22.1%    |
| Education          | LT HS grad                | 10.8%     | 2.0%       | 7.6%     |
|                    | HS graduate               | 35.3%     | 18.7%      | 35.7%    |
|                    | Some Coll/Assoc Degree    | 21.0%     | 28.9%      | 22.2%    |
|                    | College grad+             | 32.8%     | 50.4%      | 34.6%    |
| Race/Ethnicity     | White, non-Hispanic       | 75.4%     | 84.7%      | 77.9%    |
|                    | Black, non-Hispanic       | 9.4%      | 6.6%       | 9.0%     |
|                    | Hispanic                  | 9.0%      | 4.5%       | 7.6%     |
|                    | Other/Mixed, non-Hispanic | 6.2%      | 4.2%       | 5.6%     |
| Census region      | Northeast                 | 18.5%     | 19.0%      | 18.8%    |
|                    | Midwest                   | 21.2%     | 21.6%      | 21.6%    |
|                    | South                     | 37.8%     | 36.6%      | 37.3%    |
|                    | West                      | 22.5%     | 22.8%      | 22.3%    |
| Civic engagement   | Not civically engaged     | 63.5%     | 48.1%      | 62.0%    |
|                    | Civically engaged         | 36.5%     | 51.9%      | 38.0%    |
| Population density | 1 Least dense             | 23.2%     | 19.1%      | 23.5%    |
|                    | 2                         | 20.9%     | 20.2%      | 21.5%    |
|                    | 3                         | 19.9%     | 23.1%      | 19.9%    |
|                    | 4                         | 18.4%     | 20.0%      | 17.9%    |
|                    | 5 Most dense              | 17.6%     | 17.6%      | 17.2%    |
| Party ID (panel)   | Rep                       | 33.2%     | 27.9%      | 33.1%    |
|                    | Dem                       | 33.1%     | 39.7%      | 32.6%    |
|                    | Ind/Other                 | 33.7%     | 32.5%      | 34.2%    |
| Voter Registration | Registered to vote        | 91.6%     | 95.9%      | 92.8%    |
|                    | Not registered            | 8.4%      | 4.1%       | 7.2%     |

| Category           | Values               | Parameter | Unweighted | Weighted |
|--------------------|----------------------|-----------|------------|----------|
| Religion           | Affiliated           | 79.8%     | 77.1%      | 79.9%    |
|                    | Not Affiliated       | 20.2%     | 22.9%      | 20.1%    |
| Internet Frequency | Almost constantly    | 14.5%     | 18.8%      | 15.2%    |
|                    | Several times a day  | 50.3%     | 65.3%      | 52.7%    |
|                    | About once a day     | 11.8%     | 7.7%       | 11.9%    |
|                    | Several times a week | 7.3%      | 3.2%       | 7.2%     |
|                    | Less often           | 5.4%      | 2.0%       | 4.4%     |
|                    | Not an internet user | 10.7%     | 3.0%       | 8.6%     |
|                    |                      |           |            |          |

**eTable 2. Sample Disposition and Response Rates**

| Completion Rates/Composite Response Rates                         | Total  |
|-------------------------------------------------------------------|--------|
| Total Sample (Invited to participate)                             | 4158   |
| Screen-outs                                                       | 11     |
| Total Eligible                                                    | 4147   |
| Quality control removals                                          | 30     |
| Incompletes                                                       | 138    |
| Quota full                                                        | 0      |
| Completions*                                                      | 2005   |
| Incidence/Eligibility rate                                        | 99.45% |
| Survey Completion rate (Completions/Total invited to participate) | 48.22% |
| Survey RR3                                                        | 48.46% |

*\*Excludes screen-outs or data quality removals that completed the survey.*

### **Target Population Benchmarks<sup>1</sup>**

Data were weighted to distributions of sex by age, detailed education, race/ethnicity, census region, civic engagement, population density, political party,<sup>2</sup> voter registration, religious affiliation, and internet use frequency. The main demographic benchmarks were obtained from the 2021 Current Population Survey (CPS).<sup>3</sup> The civic engagement benchmark was derived from September 2019 CPS Volunteering and Civic Life Supplement data.<sup>2,4</sup> Population density was derived from Census Planning Database 2020.<sup>5</sup> The registered voter benchmark is from Aristotle Voter Data 2021 and Annual Estimates of the Resident Population by Single Year of Age and Sex for the United States: April 1, 2020, to July 1, 2021, from the U.S. Census Bureau.<sup>6</sup> The party ID, internet frequency, and religious affiliation benchmarks came from NPORS annual dataset released by Pew Research.<sup>7</sup> Weights were trimmed at the 2<sup>nd</sup> and 98<sup>th</sup> percentiles to prevent individual interviews from having too much influence on survey-derived estimates.

**eTable 3. Medical Conditions**

| Demographics                                 | All  | Any cost-related nonadherence | No cost-related nonadherence | P-Value |
|----------------------------------------------|------|-------------------------------|------------------------------|---------|
| Number of Chronic Conditions                 |      |                               |                              | <0.001  |
| None                                         | 5.2  | 1.8                           | 6.0                          |         |
| 1                                            | 12.2 | 6.3                           | 13.7                         |         |
| 2                                            | 16.0 | 9.6                           | 17.6                         |         |
| 3                                            | 20.0 | 19.7                          | 20.1                         |         |
| 4                                            | 17.5 | 17.0                          | 17.6                         |         |
| 5                                            | 12.4 | 14.8                          | 11.7                         |         |
| 6+                                           | 16.8 | 30.8                          | 13.3                         |         |
| Chronic Conditions                           |      |                               |                              |         |
| Alzheimer's Disease / Dementia               | 1.5  | 2.0                           | 1.4                          | 0.39    |
| Anxiety                                      | 20.5 | 30.3                          | 18.0                         | <0.001  |
| Asthma                                       | 14.9 | 26.5                          | 12.0                         | <0.001  |
| Cancer                                       | 25.7 | 22.8                          | 26.4                         | 0.14    |
| Chronic Kidney Disease                       | 7.8  | 10.6                          | 6.8                          | 0.009   |
| Chronic Obstructive Pulmonary Disease (COPD) | 11.4 | 20.6                          | 9.1                          | <0.001  |
| Depression                                   | 20.5 | 33.0                          | 17.3                         | <0.001  |
| Diabetes/Sugar Diabetes                      | 23.1 | 33.4                          | 20.5                         | <0.001  |
| Glaucoma                                     | 10.2 | 11.2                          | 9.9                          | 0.47    |
| Heart Disease / Ischemic Heart Disease       | 17.7 | 21.6                          | 16.7                         | 0.02    |
| High Blood Pressure (Hypertension)           | 66.5 | 73.4                          | 64.7                         | 0.0009  |
| High Cholesterol                             | 59.8 | 65.2                          | 58.4                         | 0.0135  |
| Irregular Heartbeat (Atrial Fibrillation)    | 19.0 | 24.9                          | 17.5                         | 0.0006  |
| Osteoporosis                                 | 19.6 | 26.5                          | 17.8                         | <0.001  |
| Rheumatoid Arthritis / Osteoarthritis        | 35.9 | 49.5                          | 32.4                         | <0.001  |

**References for eTables.**

1. Jennifer Su, Jonathan Best, Jessica Stapleton. SSRS Opinion Panel Methods Report Survey on Medication Cost Conversations and Perceptions of a Real Time Benefit Tool. Published online October 24, 2022.
2. SSRS. SSRS Full-service Survey and Market Research Firm. Accessed November 1, 2022. <https://ssrs.com/>
3. Ruggles S, Flood S, Goeken R, et al. IPUMS USA: Version 9.0. Published online 2019. doi:10.18128/D010.V9.0
4. US Census Bureau. Supplemental Surveys. Accessed November 1, 2022. <https://www.census.gov/programs-surveys/cps/about/supplemental-surveys.html>
5. US Census Bureau. 2020 Planning Database. Accessed November 1, 2022. <https://www.census.gov/topics/research/guidance/planning-databases/2020.html>
6. US Census Bureau. National Population by Characteristics: 2020-2021. Accessed November 1, 2022. <https://www.census.gov/data/tables/time-series/demo/popest/2020s-national-detail.html>
7. Pew Research Center. National Public Opinion Reference Survey (NPORS). Published online September 21, 2022. Accessed November 1, 2022. <https://www.pewresearch.org/methods/fact-sheet/national-public-opinion-reference-survey-npors/>

**eAppendix.** Medication Cost Conversations and Perceptions of a Real-Time Benefit Tool  
National Patient Survey

## **Study Overview**

This survey is for a study about the cost of prescription medications and the tools that doctors and patients may use to discuss medication costs during office visits.

The study is being led by Vanderbilt University's School of Medicine and is funded by the Robert Wood Johnson Foundation, the nation's largest philanthropy dedicated solely to health.

Your participation is completely voluntary, meaning that you do not have to participate if you don't want to, and you can end your participation at any time. Your name and other identifying information will NOT be attached to the survey data given to Vanderbilt for analysis. This data will be used for research purposes only and will not be used by insurance companies, drug companies, physician offices, or any other for-profit group.

We want to thank you for taking the time to participate and look forward to learning about your experiences. Do you agree to participate in this survey?

- 1. In the past 30 days, how many different prescription medications have you taken? (Fill in blank)**
  
- 2. On average, how much do you and others in your household spend each month on your prescription medications that you fill at a pharmacy or get through mail order, including any co-pays or other out-of-pocket expenses? Do you spend:**
  - Less than \$25
  - \$25 but less than \$50
  - \$50 but less than \$100
  - \$100 or more a month
  - Don't know / Refused

## **Cost-Related Barriers to Care Domain**

- 3. During the past 12 months, have you or someone in your household delayed medical care because you were worried about the cost?**
  - Yes
  - No
  - Don't Know/Refused

**4. During the past 12 months, was there a time when you or someone in your household needed a prescription medication but did not get it because you couldn't afford it?**

- Yes  
 No  
 Don't Know/Refused

**5. During the past 12 months, did you or someone in your household do any of the following things to save money on your prescription medication?**

|                                                                                                | Yes |
|------------------------------------------------------------------------------------------------|-----|
| Skipped medication doses to save money                                                         |     |
| Took less medicine to save money                                                               |     |
| Delayed filling a prescription to save money                                                   |     |
| Used someone else's medicine                                                                   |     |
| Spent less money on food, heat, or other basic needs so that you would have money for medicine |     |
| None of these to save money                                                                    |     |

**6. In the past 12 months, have you or someone in your household done any of the following to help with your prescription medication costs?**

|                                                                   | Yes | No | Don't Know |
|-------------------------------------------------------------------|-----|----|------------|
| Asked your doctor for a lower cost medication                     |     |    |            |
| Bought prescription drugs from another country                    |     |    |            |
| Asked your doctor for free medication samples                     |     |    |            |
| Used a copay card or coupons (such as GoodRx)                     |     |    |            |
| Tried to find financial assistance for your medication            |     |    |            |
| Shopped around at pharmacies to get a medication at a lower price |     |    |            |
| Borrowed money or went into debt                                  |     |    |            |

**7. If you find out at the pharmacy that you could not afford the price of a medication, what would be most likely to do? Check all that apply.**

- Go ahead and fill the prescription  
 Ask the pharmacy about lower cost options  
 Ask the pharmacy to contact the doctor's office to ask about lower cost options  
 Contact the doctor's office on your own to ask about lower cost options  
 Research how to reduce the price on your own  
 Leave the pharmacy without filling the prescription  
 Don't Know/Refused



## **Importance of Cost Conversations to Respondent Domain**

**8. Have you ever discussed the price of your medications with your doctor or someone else on your healthcare team? “Healthcare team” includes doctors, pharmacists, nurses, financial counselors, social workers, administrative workers and others.**

- Yes
- No
- Don’t Know

***\*If they answered YES to “ever discussed” question\****

**9. The last time you discussed the price of medications with your doctor or someone else on your health care team, who did you speak with? (Choose all that apply)**

- Doctor
- Pharmacist
- Nurse/Physician Assistant
- Financial Counselor
- Social Worker
- Someone else
- Does not recall

***\*If they answered YES to “ever discussed” question\****

**10. The last time you discussed the price of medications, was information about medication prices explained to you in a way that was difficult or easy to understand?**

- Very difficult to understand
- Difficult to understand
- Neither difficult nor easy to understand
- Easy to understand
- Very easy to understand
- Don’t Know/Refused

***\*If they answered YES to “ever discussed” question\****

**11. The last time you discussed the price of medications, did your doctor and other members of your healthcare team show respect for what you had to say about medication prices?**

- Yes, definitely
- Yes, somewhat
- No
- Don’t Know/Refused

***\*If they answered YES to “ever discussed” question\****

**12. The last time you discussed the price of medications, did your doctor and other members of your healthcare team spend enough time discussing medication prices with you?**

- Yes, definitely
- Yes, somewhat
- No
- Don't Know/Refused

**13. With which healthcare professional would you feel comfortable discussing the price of your medications? (Choose all that apply)**

- Doctor
- Pharmacist
- Nurse/Physician Assistant
- Financial Counselor
- Social Worker
- Someone else
- I do not want to discuss cost

**14. How often would you like your doctor to consider medication price when deciding which medication to prescribe for you?**

- Always
- Only when the medication price is over a certain amount.
- Never
- Don't Know/Refused

***\*If they answered OTHER to “how often” question\****

What Amount?

- Less than \$25 a month
- \$25 but less than \$50 a month
- \$50 but less than \$100 a month
- \$100 or more a month

## **Potential for Real-Time Benefit Tools Domain**

Imagine you went to a doctor's appointment and the following question appeared on a form you filled out when you arrived for your appointment: "Would you like to talk with your doctor about the price of your medications?" If you indicated "yes" to this question on your form, your doctor would receive an electronic reminder to review price information with you during the prescribing process.

**15. How comfortable or uncomfortable would you be answering this question?**

- Very uncomfortable
- Somewhat uncomfortable
- Neither uncomfortable nor comfortable
- Somewhat comfortable
- Very comfortable
- Don't Know/Refused

**16. If you were asked before your visit "Would you like to talk with your doctor about the price of your medications?" how would you answer?**

- "Yes, I want to talk about the price of my medications"
- "It would depend on the medication"
- "No, I do not want to talk about the price of my medications"
- I'm not sure

***\*If they answered "It depends"\****

**17. Which medication would you want to talk about the price of? (Check all that apply)**

- Only want to talk about medications I'm already taking
- Only want to talk about new medications
- Only want to talk if lower cost alternatives exist
- Only want to talk about medications that are above a certain price
- Don't Know/Refused

Imagine your doctor could use a tool in your electronic medical record during your visit that showed them an estimate of the price that you would pay for a medication, and medication alternatives, based on your insurance.

**18. Would you want your doctor to use that tool to estimate the price of your medication?**

- Yes
- No
- Don't Know/Refused

**19. Would you want your doctor to talk with you about the estimated medication price the tool came up with?**

- Yes
- No
- Don't Know

**20. If your doctor used that tool to estimate the price but did not talk about the price with you, how would you feel?**

- Not at all upset
- Slightly upset
- Somewhat upset
- Moderately upset
- Extremely upset
- Don't Know/Refused

**21. If you went to pick up that medication and the actual price was a lot more than your doctor estimated it would be when using the tool, how would you feel?**

- Not at all upset
- Slightly upset
- Somewhat upset
- Moderately upset
- Extremely upset
- Don't Know/Refused

**22. If the actual price of your medication was a lot more than your doctor estimated it would be, how, if at all, would that change your opinion about your doctor using the tool?**

- I would still want my doctor to use the tool
- I would only want my doctor to use the tool if they thought the price might be very high
- I would not want my doctor to use the tool again
- Don't Know/Refused

**23. If the actual price of your medication was a lot more than your doctor estimated it would be, how, if at all, would that affect your confidence in the doctor who prescribed your medicine?**

- It would decrease my confidence in my doctor a lot
- It would decrease my confidence in my doctor a little
- It would not decrease my confidence in my doctor at all
- Don't Know/Refused

**24. If the actual price of your medication was a lot more than your doctor estimated it would be, would it affect whether you would start or keep taking your medication?**

- Yes
- No
- Don't Know/Refused

**25. If your doctor could not use the tool to tell you your specific price for a medication, would you want your doctor to use a tool that showed them the average price paid for a medication across all patients with health insurance? Note: Your actual price may be more or less than the average.**

- Yes
- No
- Don't Know/Refused

### **Using a Patient-Facing Real-Time Benefit Tool**

**26. If you had access to an online tool that showed you (rather than your doctor) the price you would be expected to pay for your medications, would you use it?**

- Yes
- No
- I already use a tool that shows me the price of my medications
- Don't Know

***\*If yes or already use tool\****

**27. When do you or would you use the tool to look at the price of medications?**

**Check all that apply.**

- After a conversation in which my doctor indicated that it was possible the medication would be expensive
- Any time I was prescribed a new medication
- After being prescribed any medication and before visiting the pharmacy
- After visiting the pharmacy and being informed of a high cost
- Other: \_\_\_\_\_
- Don't Know/Refused

**28. If you had the choice between EITHER your doctor looking up medication prices during a visit OR you looking up medication prices after the visit, which would you prefer?**

- Have my doctor look up prices during the visit and make any needed changes at that time
- Look up prices on my own after the visit and contact my doctor to make any needed changes
- Don't Know/Refused

**29. If you are having trouble affording the price of a medication, which of the following would you prefer (Choose one answer):**

- My doctor prescribes the option they think is best.
- My doctor gives me options, tells me their prices and how well they work, and together we decide.
- My doctor gives me options, tells me their prices and how well they work, and lets me decide.
- Other: \_\_\_\_\_

### **Demographics Domain**

**30. Would you say your health is excellent, very good, good, fair, or poor?**

- Excellent
- Very good
- Good
- Fair
- Poor
- Don't Know/Refused

**31. How would you describe your household's financial situation?**

- Don't have enough to meet basic expenses
- Meet only your basic expenses
- Meet your basic expenses with a little left over for extras
- Live comfortably
- Don't Know/Refused

**32. In general, how confident are you that you have enough money or health insurance to pay for the usual medical costs that you require for the next 30 days?**

- Not at all confident
- Not too confident
- Somewhat confident
- Very confident
- Prefer not to answer
- Don't Know/Refused

**33. Have you EVER been told by a doctor or other health professional that you had any of the following medical conditions?**

|                                              | Yes | No | Refused | Don't know |
|----------------------------------------------|-----|----|---------|------------|
| Alzheimer's Disease / Dementia               |     |    |         |            |
| Anxiety                                      |     |    |         |            |
| Asthma                                       |     |    |         |            |
| Cancer                                       |     |    |         |            |
| Chronic Kidney Disease                       |     |    |         |            |
| Chronic Obstructive Pulmonary Disease (COPD) |     |    |         |            |
| Depression                                   |     |    |         |            |
| Diabetes/Sugar Diabetes                      |     |    |         |            |
| Glaucoma                                     |     |    |         |            |
| Heart Disease / Ischemic Heart Disease       |     |    |         |            |
| High Blood Pressure (Hypertension)           |     |    |         |            |
| High Cholesterol                             |     |    |         |            |
| Irregular Heartbeat (Atrial Fibrillation)    |     |    |         |            |
| Osteoporosis                                 |     |    |         |            |
| Rheumatoid Arthritis / Osteoarthritis        |     |    |         |            |

**34. How often do you need to have someone help you when you read instructions, pamphlets, or other written material from your doctor or pharmacy?**

- Always
- Often
- Sometimes
- Rarely
- Never
- Don't Know/Refused

**35. Thank you for your time today! Your participation will help add valuable information to the development of medication cost discussion tools. Is there anything else that you would like to tell us?**

Open text option.
