# Supplementary material for: Cost-Related Medication Nonadherence and Desire for Medication Cost Information Among Adults Aged 65 Years and Older in the US in 2022
Source: PubMed Central journal article supplement (PMC10196872; doi:10.1001/jamanetworkopen.2023.14211), 2023-05-18
Supplement: jamanetwopen-e2314211-s002.pdf [file jamanetwopen-e2314211-s002.pdf]

## Data Sharing Statement

Dusetzina. Cost-Related Medication Nonadherence and Desire for Medication Cost Information Among Adults Aged 65 Years and Older in the US in 2022. *JAMA Netw Open*. Published May 18, 2023. doi:10.1001/jamanetworkopen.2023.14211

### Data

**Data available:** No

### Additional Information

**Explanation for why data not available:** We will be making the full survey questionnaire available via the online supplement.
